# Supplementary material
Source: PubMed Central journal article supplement (PMC10992510)
Supplement: 262_2023_3608_MOESM1_ESM.pdf [file 262_2023_3608_MOESM1_ESM.pdf]

# Supplementary Fig. 1

**A**

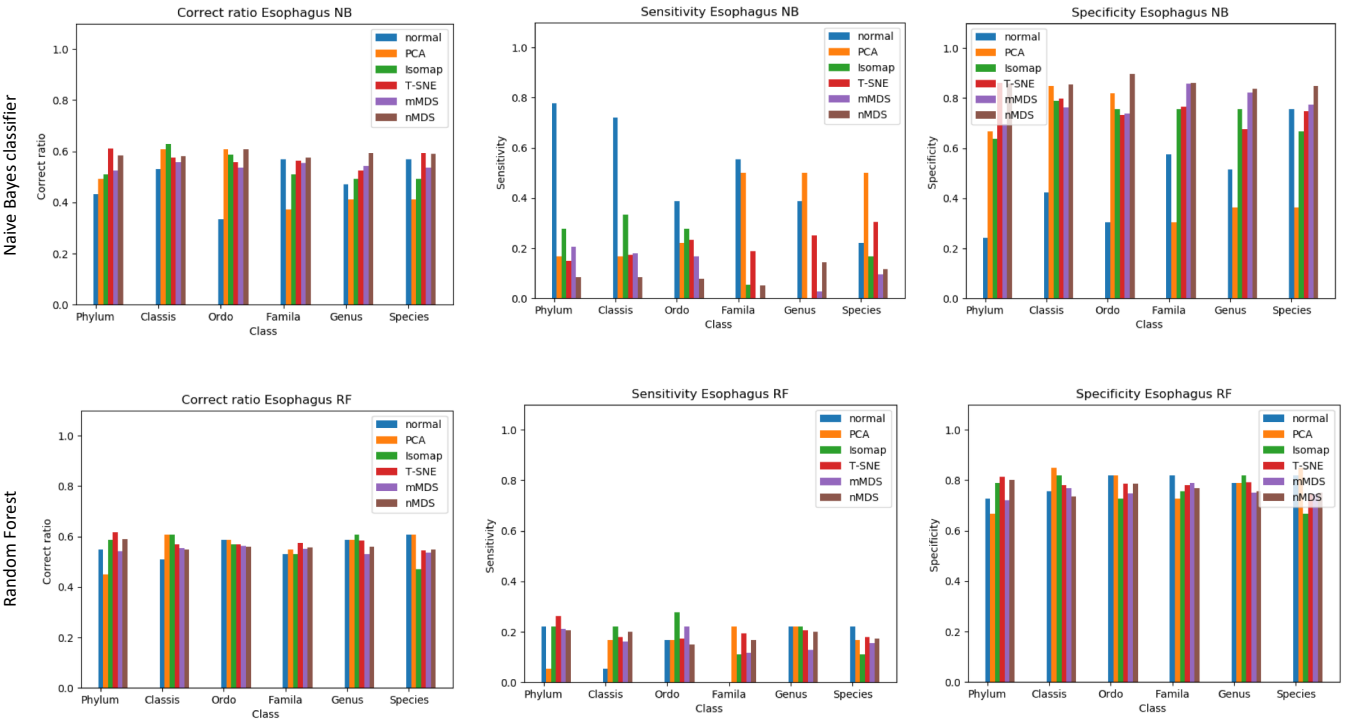

**B**

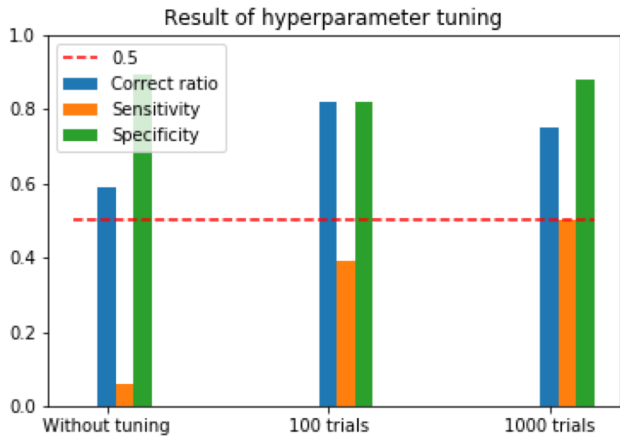

Recalculating the correct ratio, sensitivity, and specificity to identify the group with cancer recurrence.  
 (A) Calculating the correct ratio, sensitivity, and specificity to identify the group with cancer recurrence using a naïve bayes classifier (upper) or a random forest model (lower). (B) Recalculating the correct ratio, sensitivity, and specificity to identify the group with cancer recurrence utilizing hyperparameter tunings.
